# Supplementary figures and images for: A new and improved method of library preparation for non-invasive prenatal testing: plasma to library express technology
Source: publisher site journal article supplement (doi:10.1515/cclm-2022-0283), 2023-01-29

Supplementary Figure 1: Duplication ratio for increased sequencing data.


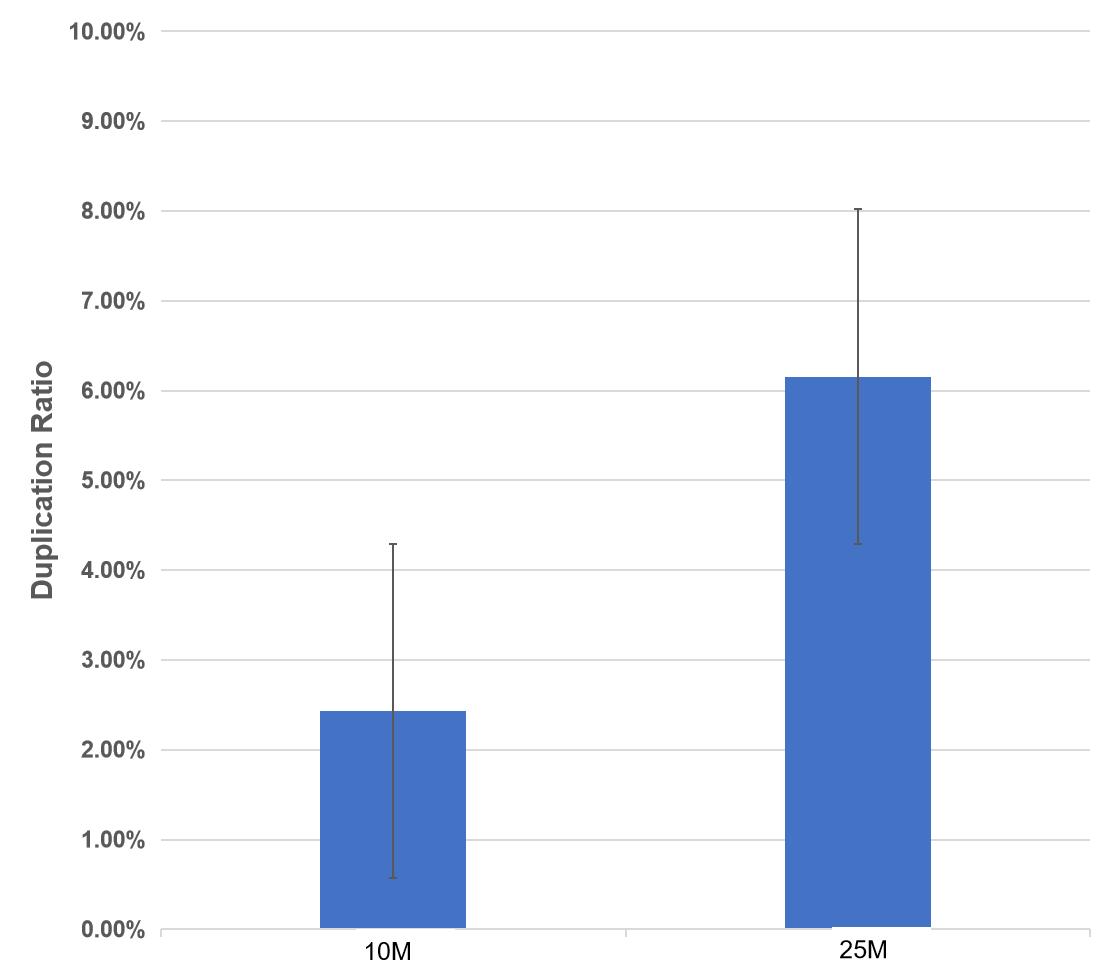

Supplement: Supplementary file 1 [file j_cclm-2022-0283_suppl_001.docx]
